# Supplementary material
Source: Copernicus journal article supplement (doi:10.5194/os-22-1987-2026)
Supplement: Supplementary file 1 [file os-22-1987-2026-supplement.pdf]

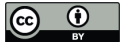

*Supplement of*

## **Dynamically downscaled future projections of the Northwest Atlantic Ocean across low to high emissions scenarios**

**Dongmin Kim et al.**

*Correspondence to:* Dongmin Kim ([dongmin.kim@noaa.gov](mailto:dongmin.kim@noaa.gov))

The copyright of individual parts of the supplement might differ from the article licence.

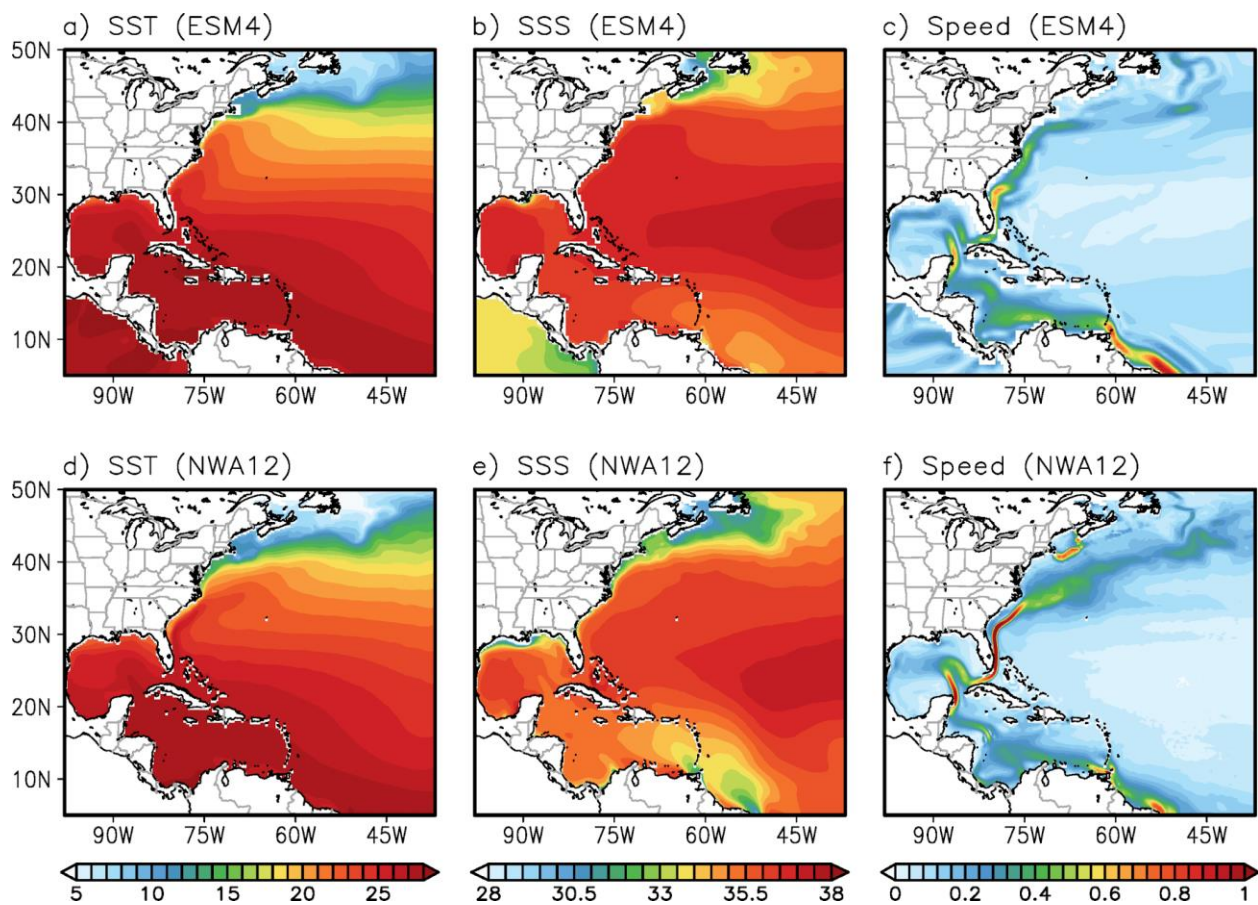

**Fig. S1.** Spatial pattern of the historical (1993-2020) mean (a) sea surface temperature (SST, °C), (b) Sea surface salinity (SSS, psu), and (c) surface current speed ( $\text{m s}^{-1}$ ) in GFDL-ESM4.1. (d)-(f) are the same as (a)-(c) but for MOM6-NWA12.

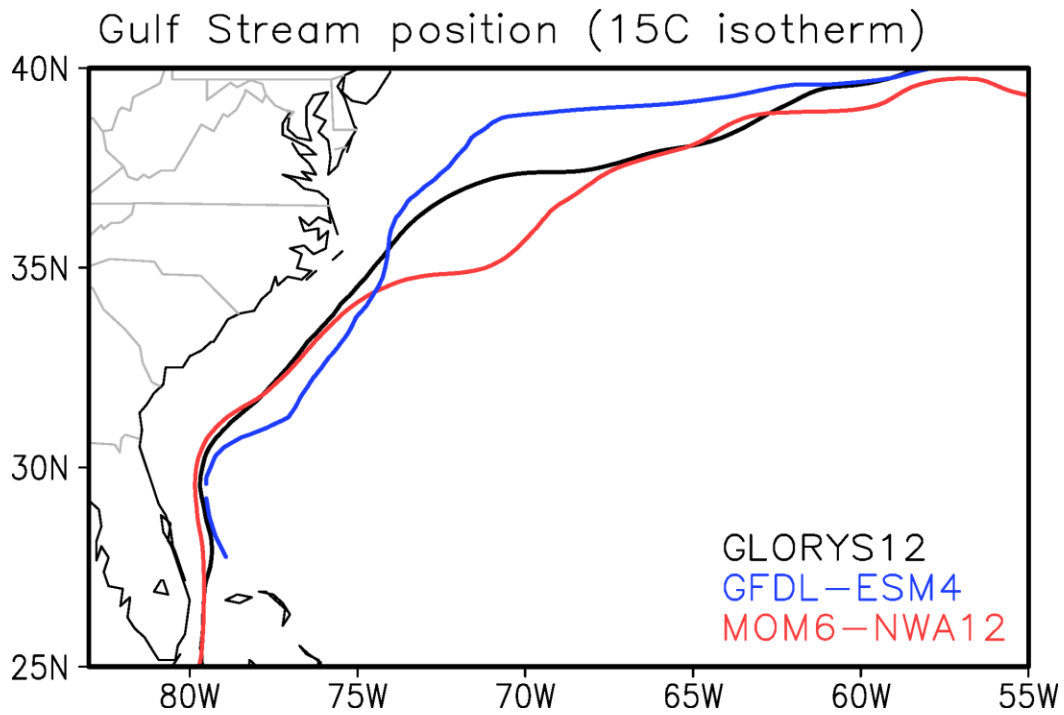

**Fig. S2.** The historical mean (1993-2020) position of the Gulf Stream (GS) in GLORYS12 (black line), GFDL-ESM4.1 (blue line), and MOM6-NWA12 (red line). The GS position is defined by the 15 °C isotherm at 200 m depth.

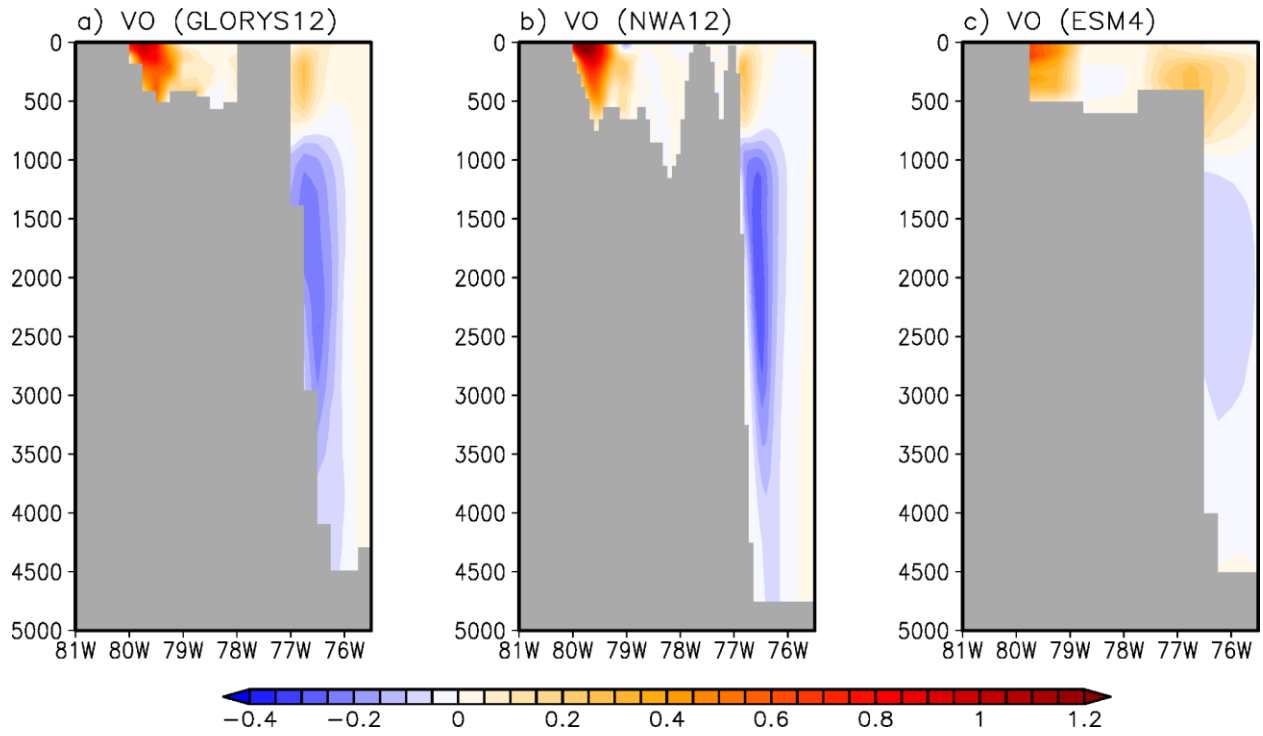

**Fig. S3.** The vertical cross section of meridional ocean speed at 26.5°N derived from (a) GLORYS12, (b) GFDL-ESM4.1 and (c) MOM6-NWA12

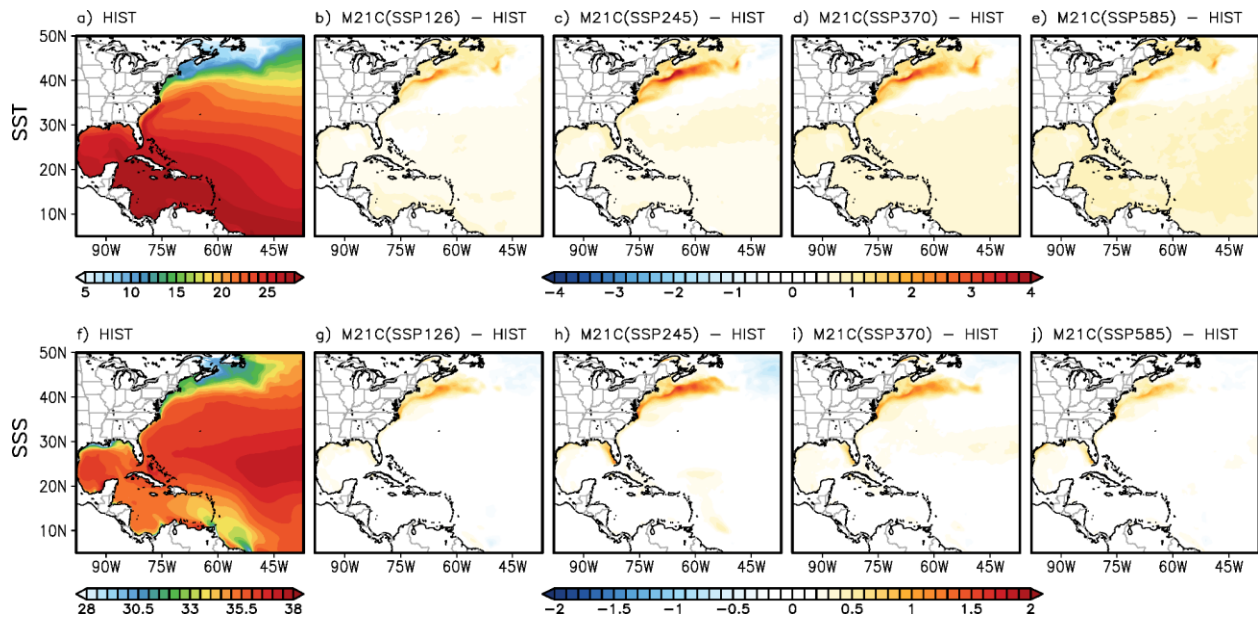

**Fig. S4.** (a) Spatial patterns of sea surface temperature (SST, °C) derived from MOM6-NWA12 during (a) historical period (1993-2020). The differences in SST between the mid 21st century (2025-2055) and historical periods in the (b) SSP-126, (c) SSP-245, (d) SSP-370 and (e) SSP-585 simulations. (f)-(j) are the same (a)-(e) but for sea surface salinity (SSS, psu).

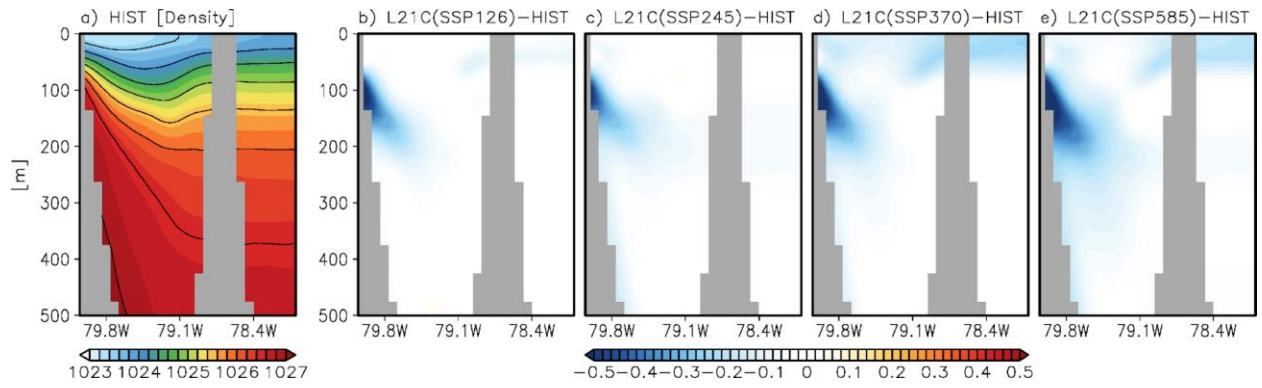

**Fig. S5.** (a) The vertical cross-sections of the mean density in the east coast of Florida ( $26.5^{\circ}\text{N}$ ,  $79.7^{\circ}\text{W}$ - $78.0^{\circ}\text{W}$ ) during the historical period (1993-2020). The difference in density between the future and historical periods from (b) SSP-126, (c) SSP-245, (d) SSP-370, and (e) SSP-585 simulations, respectively.
